# Supplementary material
Source: PubMed Central journal article supplement (PMC5645043)
Supplement: NIHMS904480-supplement-1.pdf [file NIHMS904480-supplement-1.pdf]

**Developmental Cell, Volume 42**

**Supplemental Information**

**Tension Creates an Endoreplication Wavefront  
that Leads Regeneration of Epicardial Tissue**

**Jingli Cao, Jihu Wang, Christopher P. Jackman, Amanda H. Cox, Michael A. Trembley, Joseph J. Balowski, Ben D. Cox, Alessandro De Simone, Amy L. Dickson, Stefano Di Talia, Eric M. Small, Daniel P. Kiehart, Nenad Bursac, and Kenneth D. Poss**

**SUPPLEMENTAL INFORMATION**

**Figures S1-S7**

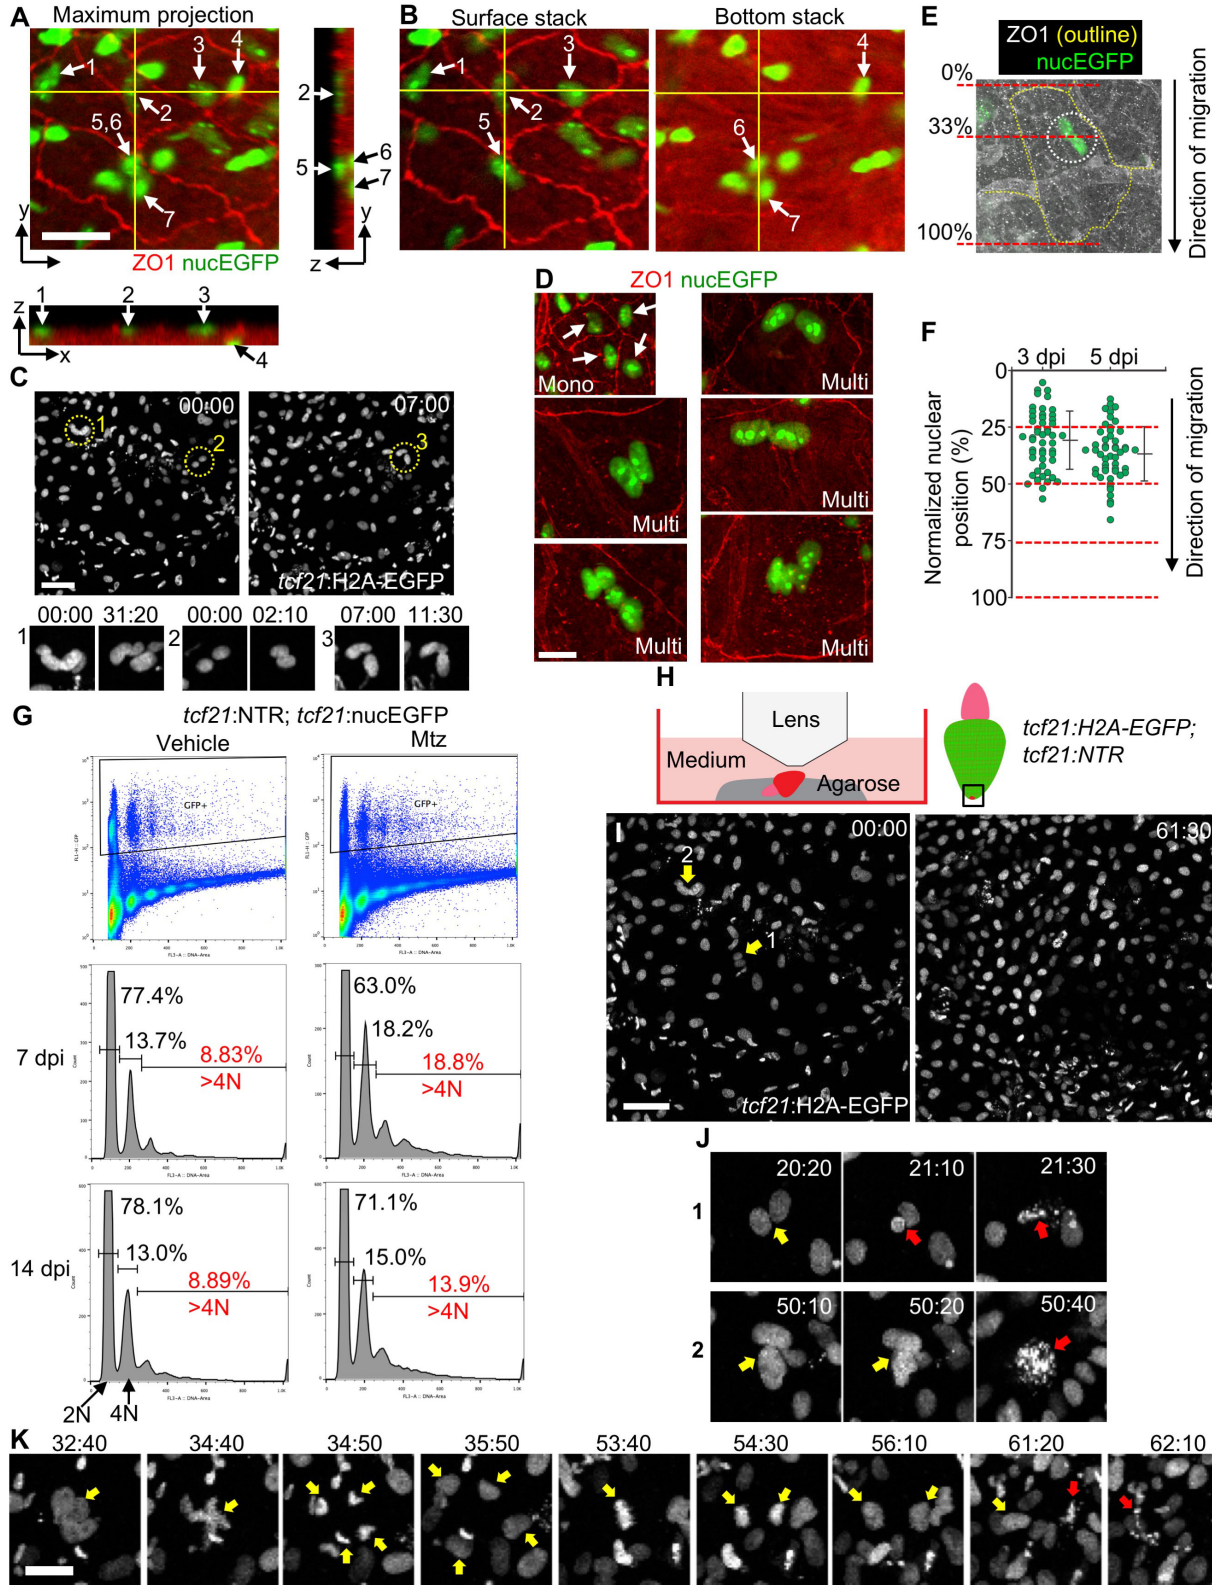

**Figure S1. Analysis of Nucleation and Apoptosis in Polyploid Cells (Related to Figure 1)**

(A) Orthogonal view of a z-stack image. A maximum projection image of the x-y plane is shown with nucEGFP in green and ZO1 staining in red. Yellow lines indicate positions for views of the y-z plane (right) and the x-z plane (bottom), respectively. Arrows and numbers denote nuclei. Scale bar, 20  $\mu\text{m}$ .

(B) Two z-axis stacks of the image shown in (A). The numbers indicate the same nuclei shown in (A). The nuclei 1, 2, 3, and 5 are in the outermost layer, while nuclei 4, 6, and 7 are in the inner layer, embedded within the muscle (red autofluorescence).

(C) Video frames from Movie S1 with *tcf21*:H2A-EGFP shown in grayscale. Nuclei of three cells are circled in low-magnification images (top), and two frames of each are displayed below. Nuclei within individual cells frequently overlap. Scale bar, 50  $\mu\text{m}$ .

(D) Examples of mononucleate cells (top left, arrows) and multinucleate cells. Scale bar, 20  $\mu\text{m}$ .

(E, F) Quantification of nuclear positions within each multinucleate cell at 3 and 5 dpi, respectively. The cell length was measured parallel to the direction of epicardial tissue regeneration. The nuclear position was defined as the center of an area encircling all of the nuclei in each cell and was normalized in percentiles to cell length.  $n = 50$  for each timepoint. Bars indicate mean  $\pm$  S.D.

(G) FACS analysis of purified epicardial cells. Epicardial cells were purified from uninjured (Vehicle, left) and regenerating samples (Mtz, right) and stained with PI for DNA content. *tcf21*:NTR; *tcf21*:nucEGFP ventricles were collected at 7 and 14 dpi. Percentages of 2N, 4N and >4N cells are indicated. Samples from regenerating hearts

have 113% (7 dpi) or 56% (14 dpi) more >4N cells (red) than those from uninjured hearts.

(H) Schematic for experiments in (I-K).

(I) Video frames acquired at the ventricular apex at the final stages of epicardial regeneration, covering 61.5 h. *tcf21*:H2A-EGFP is shown in grayscale. Arrows and numbers denote nuclei shown in (J). Scale bar, 50  $\mu$ m. See also Movie S1.

(J) High-magnification view of nuclear doublets indicated in (I) undergoing nuclear fragmentation (red arrows). Scale bar, 20  $\mu$ m.

(K) Video frames of an unconventional division of a nuclear doublet undergoing fragmentation. Yellow arrows denote multinucleate cell and daughter nuclei. Red arrows indicate nuclear fragmentation. One daughter nucleus divided again before fragmentation. Scale bar, 20  $\mu$ m. Timing, hh:mm.

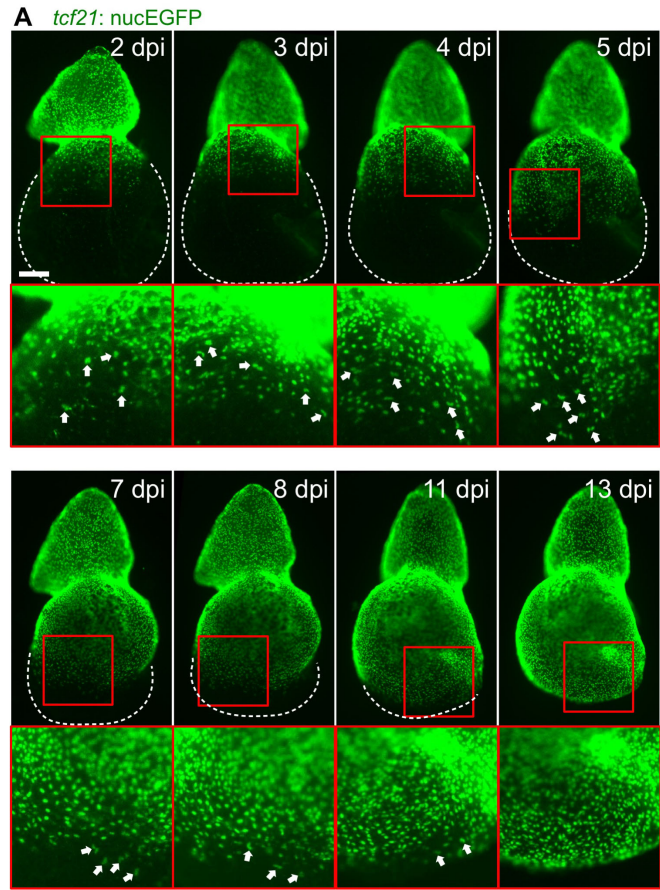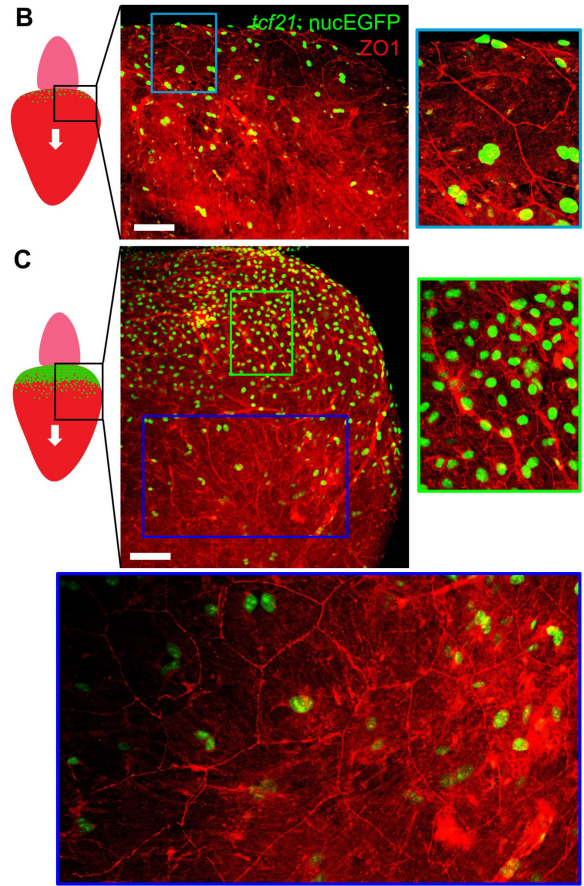

**Figure S2. Cell Size and Nuclear Number during *ex vivo* Epicardial Regeneration**  
**(Related to Figure 1)**

(A) A whole ventricular explant (with outflow tract at top) undergoing *ex vivo* epicardial regeneration. *tcf21:NTR; tcf21:nucEGFP* hearts were incubated in culture medium with 1 mM Mtz for 24 h. Explants were assessed daily for EGFP fluorescence. White dashed lines outline ventricles. Regions framed in red are enlarged to show details below each panel. White arrows denote nuclear doublets. Scale bar, 200  $\mu\text{m}$ .

(B, C) Images of flattened explants stained with an anti-ZO1 antibody (red). Images of the framed region represented in the cartoons from 2 hearts are shown. Regions framed in cyan, green and blue were enlarged in the same scale at the right or the bottom. Optical sections are shown in enlarged images in (C) to more clearly indicate ZO1 staining. Scale bar, 100  $\mu\text{m}$ .



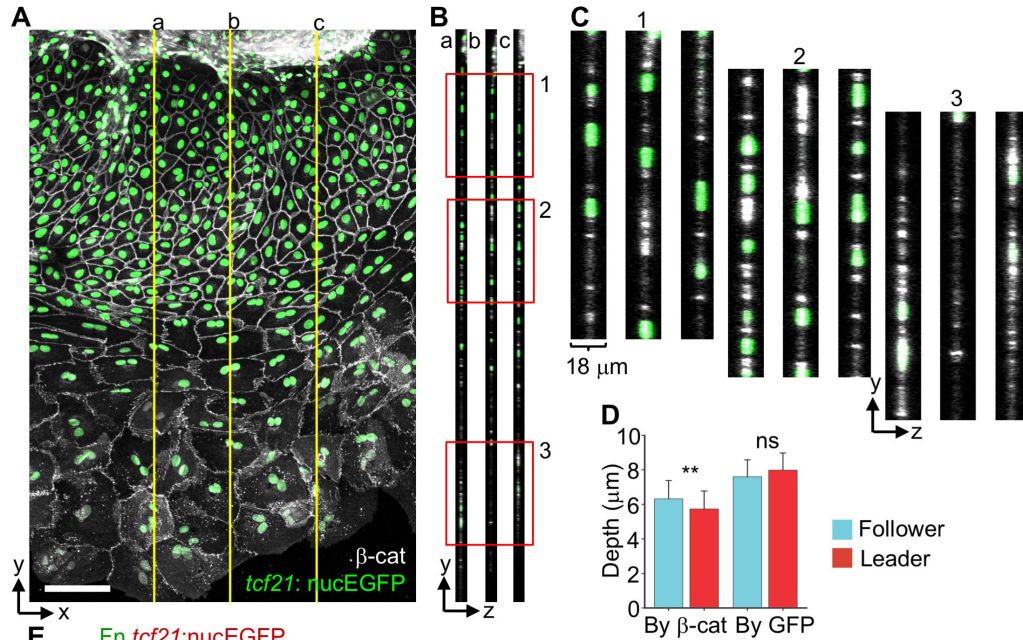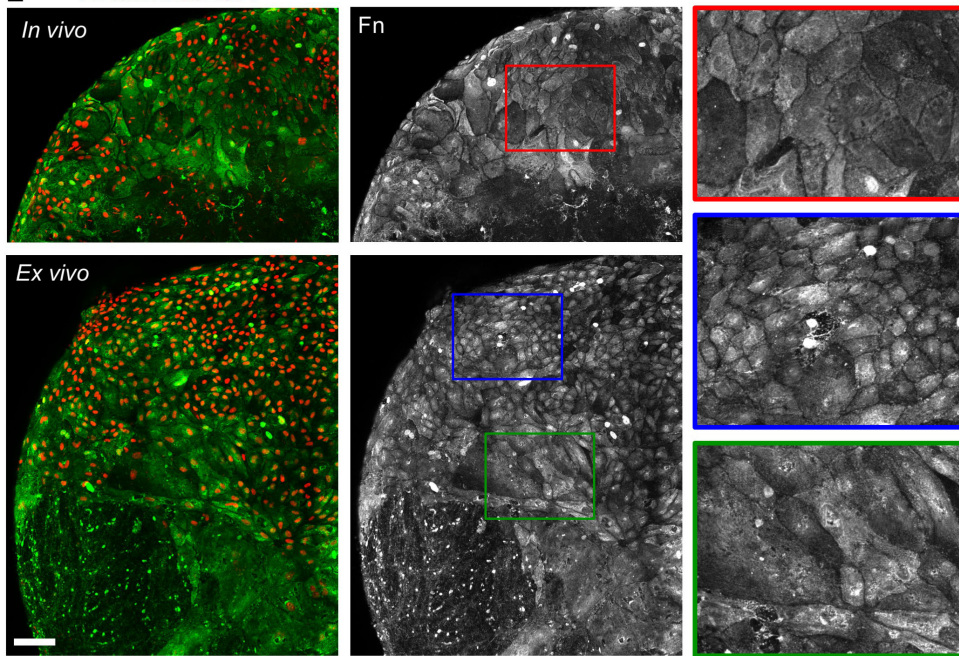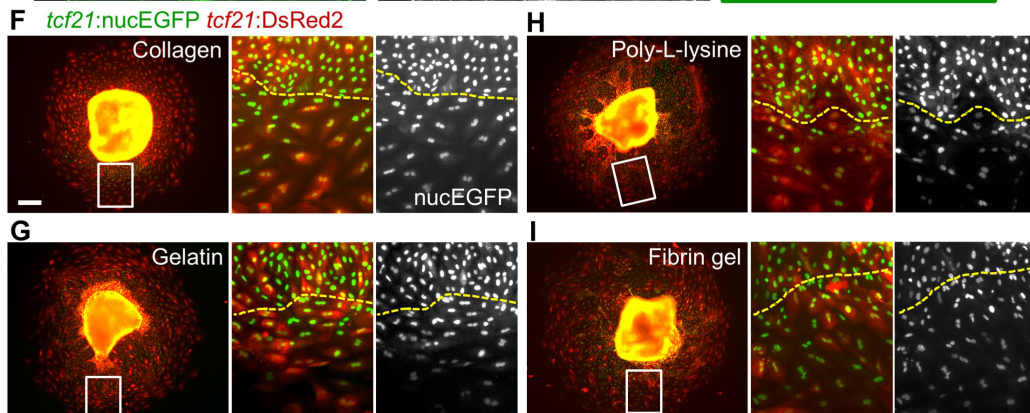



**Figure S3. Analysis of Cell Volume and the Relevance of ECM Components to Epicardial Regeneration (Related to Figure 2)**

(A) A maximum projection view of an explant culture, showing *tcf21:nucEGFP* in green and  $\beta$ -catenin staining in grayscale. Three yellow lines (a, b and c) denote positions of views for the y-z planes in (B).

(B, C) y-z views for the planes denoted in (A). The framed regions in (B) are enlarged to show details in (C).

(D) Quantification of the cell depths by measuring junctions ( $\beta$ -catenin signals, By  $\beta$ -cat) or nuclei (*nucEGFP* signals, By GFP).  $n = 50$  (By  $\beta$ -cat, follower),  $64$  (By  $\beta$ -cat, leader),  $25$  (By GFP, follower) and  $10$  (By GFP, leader), respectively. \*\*  $P < 0.01$ ; ns, not significant; Mann-Whitney Rank Sum Test. Bars indicate mean  $\pm$  S.D.

(E) Images of fibronectin (Fn) staining of regenerating hearts both *in vivo* and *ex vivo*. Fn is shown in green (merged images) or grayscale (single-channel images) and *tcf21:nucEGFP* is shown in red. The framed regions are enlarged to show details on the right. Scale bar,  $100 \mu\text{m}$ .

(F-I) *tcf21:nucEGFP*; *tcf21:DsRed2* epicardial explants were plated in differently coated dishes for 5 days. Dishes were coated with 0.01% type I collagen (F), 0.1% gelatin (G) or 0.01% poly-L-lysine (H) solutions overnight. Fibrin gel (I) was freshly made as described previously (Kim, et al., 2012). The framed regions of left panels are enlarged to show as middle (merged) and right panels (*nucEGFP* only). The yellow lines approximately separate follower (top) and leader cell regions (below). Scale bar,  $100 \mu\text{m}$ .

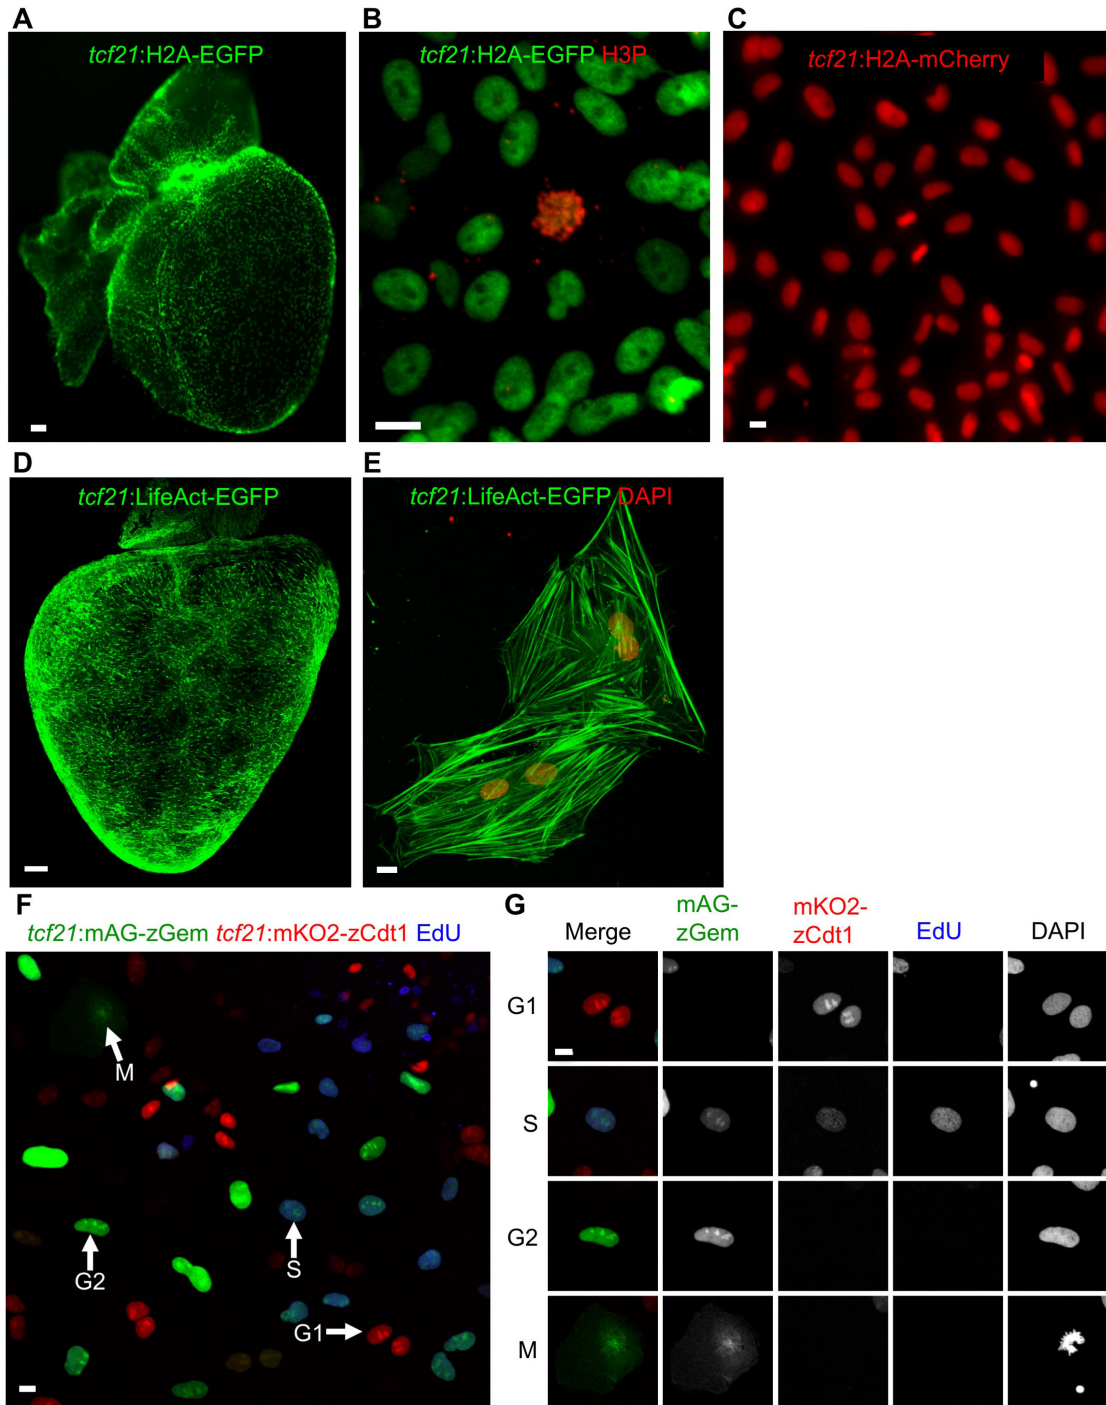

### Figure S4. New Reporter Lines for Live Imaging (Related to Figure 3)

(A, B) A *tcf21:H2A-EGFP* reporter line indicates chromatin in epicardial cells of a whole-mounted heart (A) and in epicardial explant culture (B). Anti-phospho-Histone H3 staining (H3P) was performed to label condensed chromatin (red). Scale bars, 100  $\mu\text{m}$  (A) or 10  $\mu\text{m}$  (B).

(C) High-magnification view of *tcf21:H2A-mCherry* epicardial cells. Scale bar, 10  $\mu\text{m}$

(D, E) A *tcf21:LifeAct-EGFP* reporter labels F-actin in whole-mounted (D) or isolated epicardial cells (E). DAPI stains nuclei red in (E). Scale bars, 100  $\mu\text{m}$  (D) or 10  $\mu\text{m}$  (E).

(F, G) Epicardial explant culture from a *tcf21:FUCCI* heart, stained after a 1 h pulse of EdU to mark S phase. Arrows in (F) denotes different cell cycle phases, also highlighted in (G). Scale bars, 10  $\mu\text{m}$ .

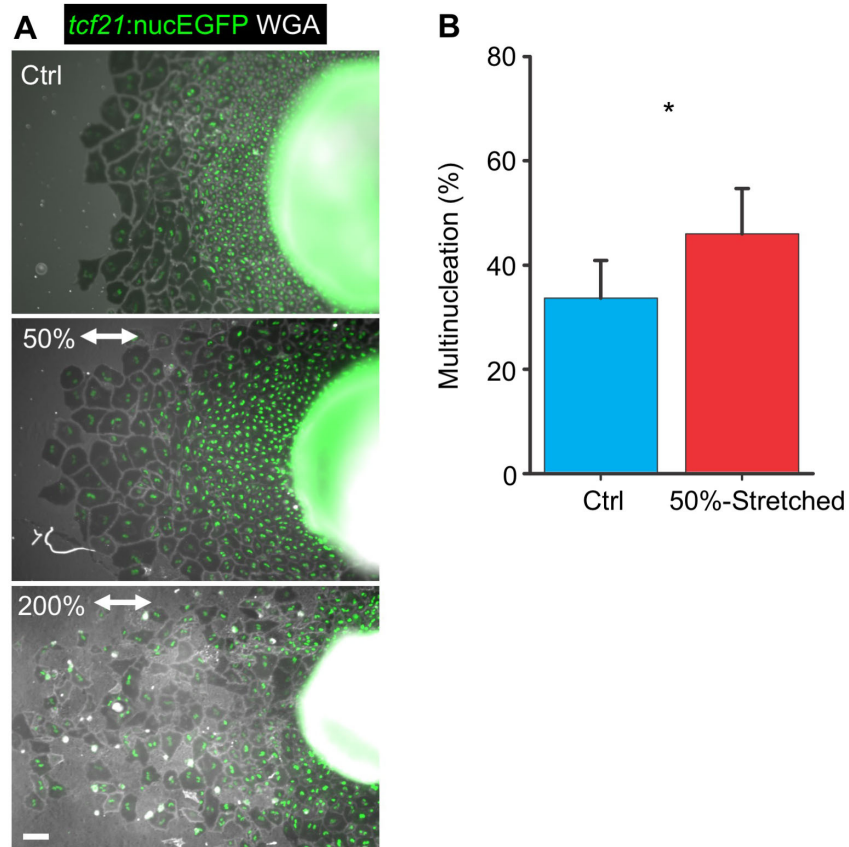

### Figure S5. Mechanical Stretching of Epicardial Sheets (Related to Figure 5)

(A) The same experiment as shown in Figure 5, using *pcf21:nucEGFP* tissue with cell shapes outlined with a WGA staining (grayscale). (Top) Unstretched control. (Middle) Explants after 50% stretch. (Bottom) Explants after 200% stretch, which typically damaged the tissue. The dual arrow indicates stretch direction. Scale bars, 100  $\mu$ m.

(B) Quantification of epicardial cell multinucleation within a quadrant of the epicardial sheet shown in (A) after 50% stretch.  $n = 8$  (Ctrl) and 7 (Stretched) explants. \*  $P < 0.05$ , Mann-Whitney Rank Sum Test. Bars indicate mean  $\pm$  S.D.

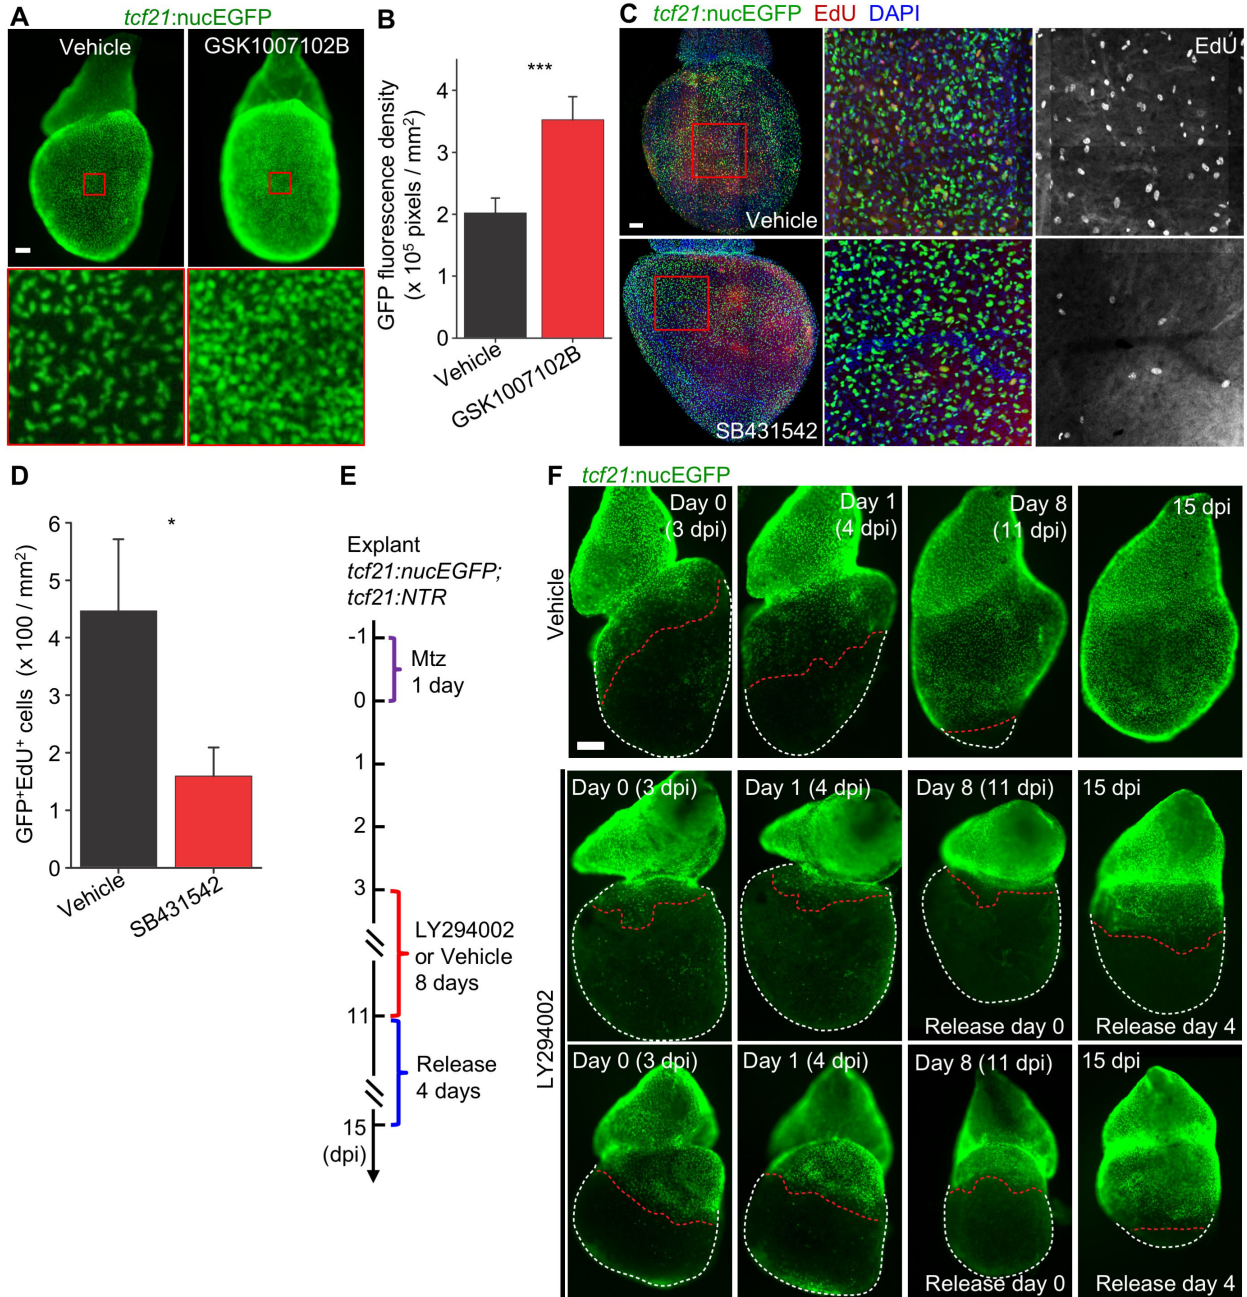



**Figure S6. Chemical Screening for Regulators of Epicardial Cell Proliferation  
(Related to Figure 7)**

(A) Whole mounted *tcf21:nucEGFP* ventricles after 6 days of culture as explants, treated with DMSO (Vehicle) or GSK1007102B. Framed regions are enlarged and shown below.

(B) Quantification of EGFP fluorescence density.  $n = 8$  (Vehicle) and 5 (GSK1007102B) explants, respectively. \*\*\*  $P < 0.001$ , Student's *t*-test. Bars indicate mean  $\pm$  S.D.

(C) Images of fixed and flattened *tcf21:nucEGFP* explants after 2 days of culture with DMSO (Vehicle) or SB431542. Samples were incubated with EdU for 1 h before fixation (shown in red and grayscale). DNA was stained with DAPI (blue). Scale bars, 100  $\mu\text{m}$ .

(D) Quantification of EGFP<sup>+</sup>EdU<sup>+</sup> nuclei per  $\text{mm}^2$  on the ventricular surface, from hearts in (C).  $n = 3$  explants for each. \*  $P < 0.05$ , Student's *t*-test. All error bars indicate S.D.

(E, F) PI3K regulates epicardial regeneration. (E) Schematic for experiments in (F). *tcf21:NTR*; *tcf21:nucEGFP* animals were used. LY294002 (50  $\mu\text{M}$ ) was added for 8 days (3 - 11 dpi). Then, explants were rinsed twice with PBS and further cultured for 4 days. (F) Epicardial regeneration *ex vivo* in the presence of DMSO (Vehicle) or 50  $\mu\text{M}$  LY294002. All vehicle-treated explants (16 of 16) displayed regeneration. All LY294002-treated explants displayed a block of regeneration (23 of 23), which resumed in each case after drug wash-out. Scale bar, 200  $\mu\text{m}$ .

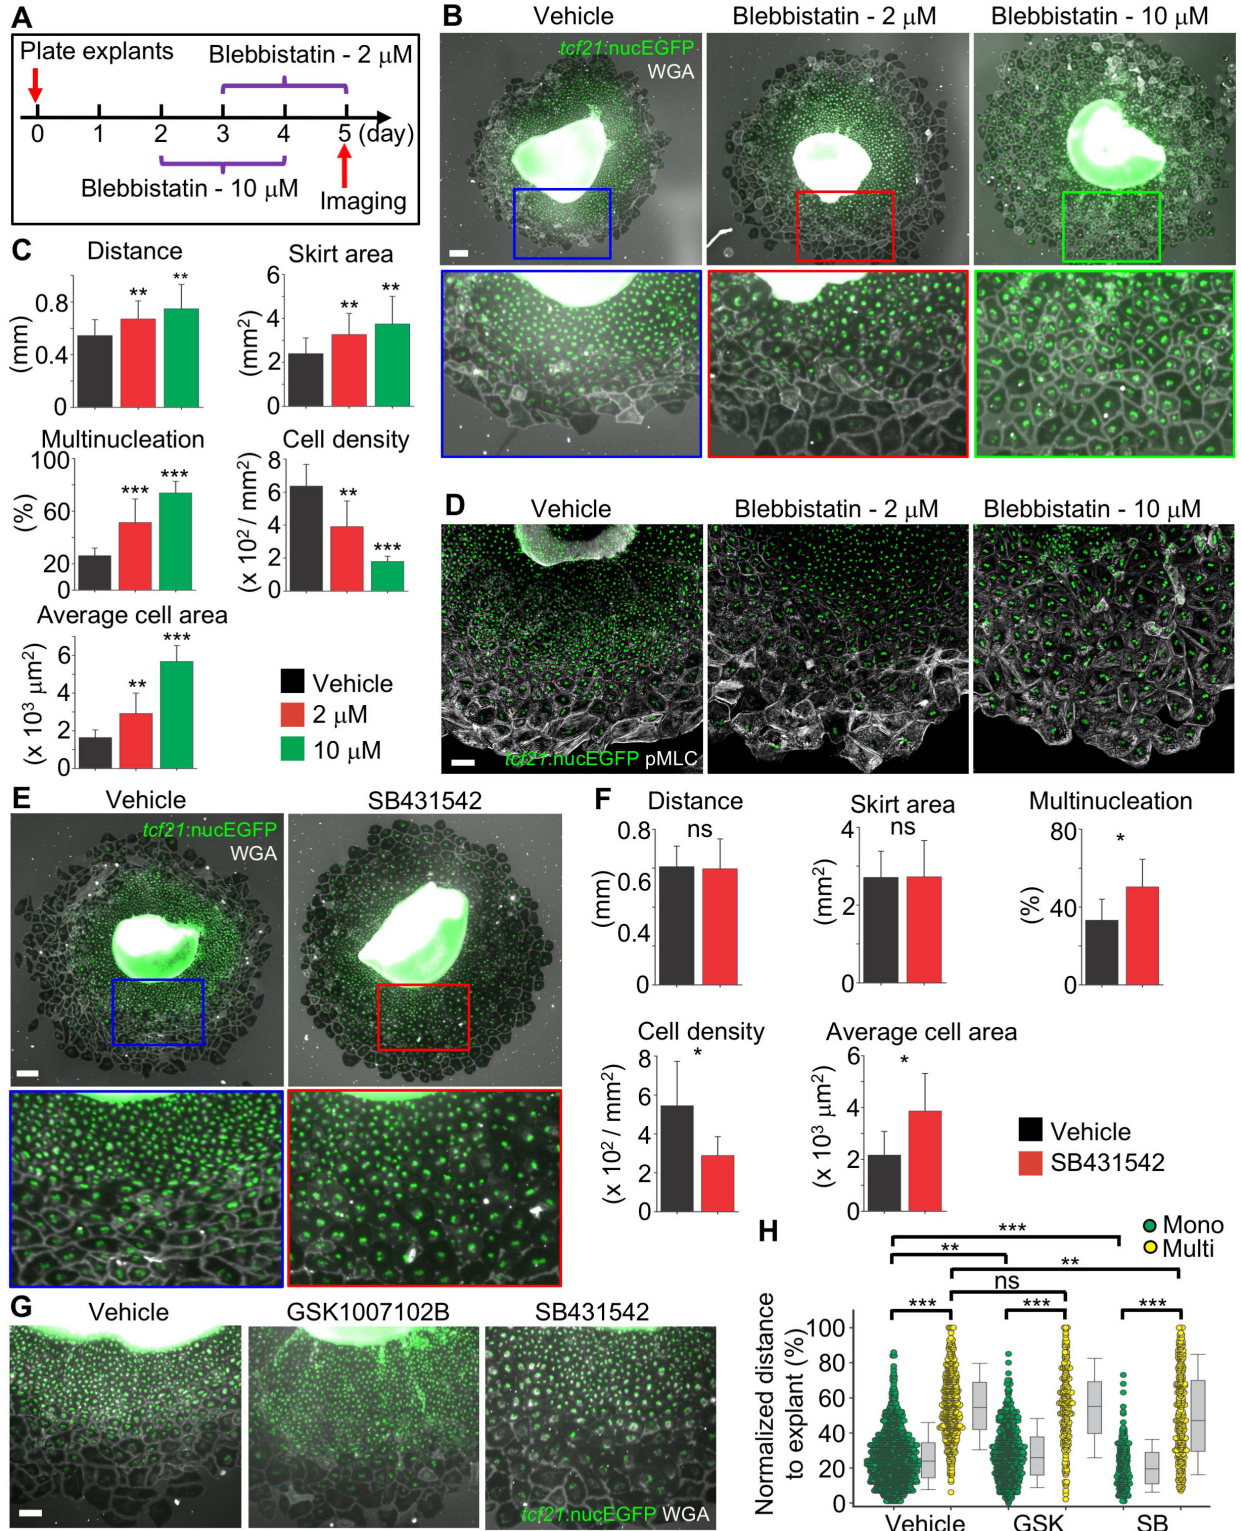

## Figure S7. Chemical Treatment of Epicardial Explant Cultures (Related to Figure 7)

(A) Schematic for experimental design in (B-D). *tcf21:nucEGFP* explants were plated for 5 days. Blebbistatin was added from day 3 to day 5 (2  $\mu$ M) or from day 2 to day 4 (10  $\mu$ M). Images were acquired and analyzed at day 5.

(B) Epicardial explant culture assays with Vehicle or Blebbistatin (2  $\mu$ M or 10  $\mu$ M) treatment as shown in (A). Framed regions are enlarged below to show details. *tcf21:nucEGFP* is shown in green, WGA staining is shown in grayscale. Scale bar, 200  $\mu$ m.

(C) Quantification of epicardial tissue growth in (B). For migration distance and skirt area,  $n = 20$  (Vehicle), 20 (2  $\mu$ M), and 18 (10  $\mu$ M) explants, respectively. For nucleation, cell density, and average cell area,  $n = 10$  explants for each treatment. \*\*\*  $P < 0.001$ ; \*\*  $P < 0.01$ ; Mann-Whitney Rank Sum Test. All comparisons were versus Vehicle-treated group. Bars indicate mean  $\pm$  S.D.

(D) Epicardial explant culture in (A) was stained with pMLC (Ser19, grayscale). Scale bar, 100  $\mu$ m.

(E) Epicardial explant culture assays with Vehicle or SB431542 (10  $\mu$ M) treatment. *tcf21:nucEGFP* explants (shown in green) were plated for 5 days. WGA staining is used to outline cells (grayscale). Drug was added from day 0 to day 5. Framed regions are enlarged below to show details. Scale bar, 200  $\mu$ m.

(F) Quantification of epicardial tissue growth in (E). For migration distance and skirt area,  $n = 20$  explants for each. For nucleation, cell density, and average cell area,  $n = 10$  explants for each treatment. \*  $P < 0.05$ ; ns, not significant; Mann-Whitney Rank Sum Test. Bars indicate mean  $\pm$  S.D.

(G) Epicardial explant culture assays with Vehicle, GSK1007102B (0.5  $\mu$ M) or SB431542 (10  $\mu$ M) treatment. *tcf21:nucEGFP* explants (shown in green) were plated for 5 days. WGA staining is used to outline cells (grayscale). Drugs were added from day 0 to day 5. Scale bar, 100  $\mu$ m.

(H) Spatial distribution of nucleation after treatment with Vehicle, GSK1007102B (GSK), or SB431542 (SB) as shown in (G).  $n = 1,481$  (Vehicle), 819 (GSK), and 439 (SB) cells, respectively. \*\*\*  $P < 0.001$ ; ns, not significant; Mann-Whitney Rank Sum Test. Bars indicate S.D.
